# ANESTHESIOLOGY

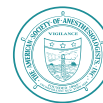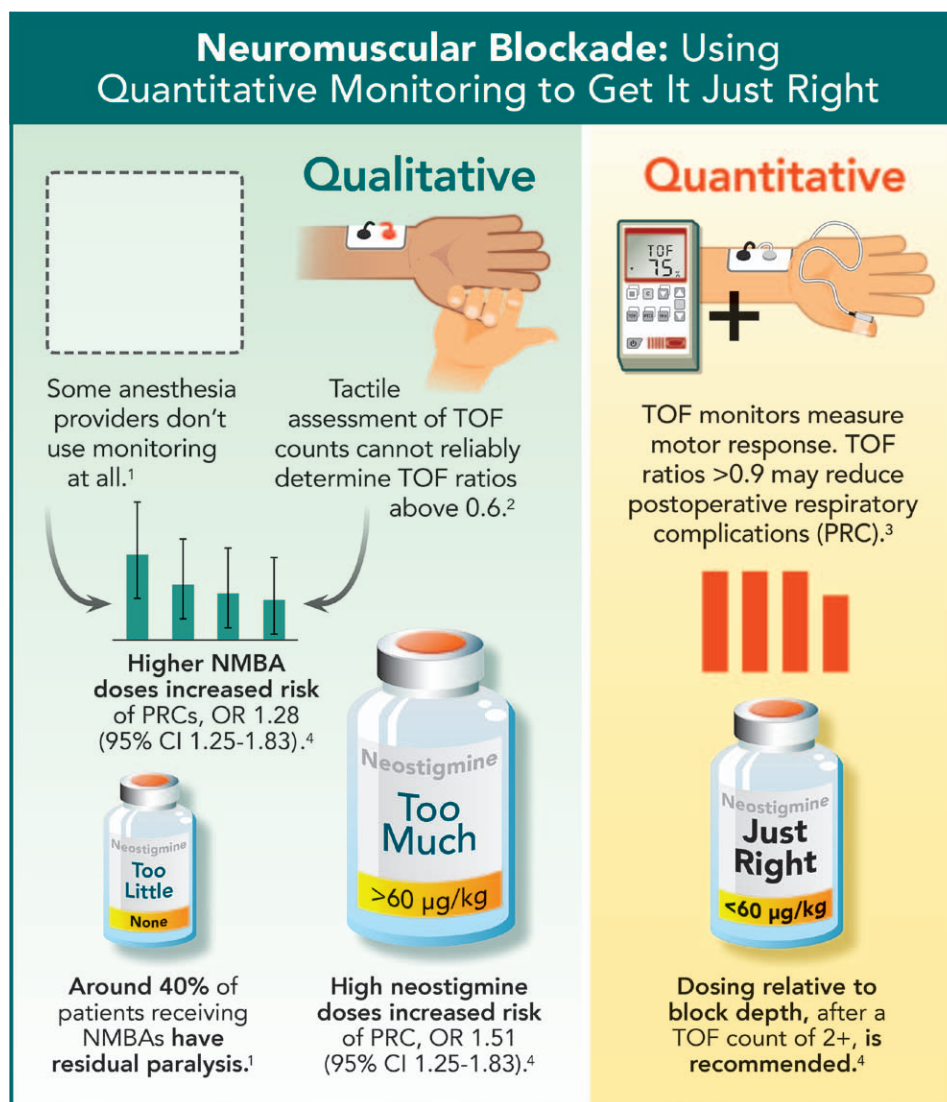

NMBA = neuromuscular-blocking agent; OR = odds ratio; TOF = train of four.

Infographic created by Jonathan P. Wanderer, Vanderbilt University School of Medicine, and James P. Rathmell, Massachusetts General Hospital/Harvard Medical School. Illustration by Annemarie Johnson, Vivo Visuals. Dr. Wanderer is funded by the Foundation for Anesthesia Education and Research, Rochester, Minnesota, and Anesthesia Quality Institute's Mentored Research Training Grant - Health Services Research, Schaumburg, Illinois. Address correspondence to Dr. Wanderer: jon.wanderer@vanderbilt.edu.

1. Naguib M, Kopman AF, Lien CA, Hunter JM, Lopez A, Brull SJ: A survey of current management of neuromuscular block in the United States and Europe. *Anesth Analg* 2010; 111:110-9

2. Brull SJ, Murphy GS: Residual neuromuscular block: Lessons unlearned. Part II: Methods to reduce the risk of residual weakness. *Anesth Analg* 2010; 111:129-40

3. Murphy GS, Brull SJ: Residual neuromuscular block: Lessons unlearned. Part I: Definitions, incidence, and adverse physiologic effects of residual neuromuscular block. *Anesth Analg* 2010; 111:120-8

4. McLean DJ, Diaz-Gil D, Farhan HN, Ladha KS, Kurth T, Eikermann M: Dose-dependent association between intermediate-acting neuromuscular-blocking agents and postoperative respiratory complications. *ANESTHESIOLOGY* 2015; 122:1201-13
